# Supplementary material
Source: PubMed Central journal article supplement (PMC4927350)
Supplement: NIHMS757989-supplement-FINAL_PRODUCTION_FILE__SDC_1.pdf [file NIHMS757989-supplement-FINAL_PRODUCTION_FILE__SDC_1.pdf]

Table S1. Latent Profile Prevalence, (Log-transformed) Mean, and Standard Deviation for the 4-Profile Solution for 262 Healthy Adolescent Girls

|                                   | Profiles    |           |             |           |               |           |              |           |
|-----------------------------------|-------------|-----------|-------------|-----------|---------------|-----------|--------------|-----------|
|                                   | Low Overall |           | High Innate |           | High Adaptive |           | High Overall |           |
| <i>Prevalence (n)</i>             | 118         |           | 55          |           | 70            |           | 19           |           |
| <i>Avg. Posterior Probability</i> | .977        |           | .958        |           | .995          |           | .944         |           |
| <i>Cytokines</i>                  | <i>M</i>    | <i>SD</i> | <i>M</i>    | <i>SD</i> | <i>M</i>      | <i>SD</i> | <i>M</i>     | <i>SD</i> |
| IL-4                              | 0.24        | 0.80      | 0.55        | 1.15      | 4.20          | 0.69      | 4.66         | 2.56      |
| IL-13                             | 0.04        | 0.75      | 1.31        | 1.05      | 4.08          | 0.54      | 4.95         | 1.36      |
| IL-5                              | -0.82       | 0.78      | -0.43       | 0.99      | 0.82          | 0.74      | 2.44         | 1.06      |
| IFN- $\gamma$                     | 0.07        | 0.56      | 1.26        | 1.27      | 3.37          | 0.63      | 3.89         | 1.91      |
| IL-1 $\beta$                      | 0.25        | 0.92      | 1.98        | 1.31      | 1.16          | 0.57      | 3.07         | 1.47      |
| GM-CSF                            | 1.50        | 1.76      | 4.13        | 1.88      | 2.53          | 0.70      | 4.62         | 1.90      |
| IL-2                              | 0.76        | 1.19      | 2.58        | 1.06      | 2.70          | 0.69      | 4.39         | 1.06      |
| IL-8                              | 1.54        | 0.77      | 1.97        | 0.61      | 2.20          | 0.55      | 3.14         | 1.12      |
| IL-7                              | 2.23        | 0.78      | 3.09        | 0.74      | 2.70          | 0.35      | 4.33         | 1.10      |
| TNF- $\alpha$                     | 1.93        | 0.56      | 2.08        | 0.55      | 2.04          | 0.34      | 2.81         | 1.03      |
| IL-10                             | 1.50        | 0.88      | 2.78        | 1.26      | 3.14          | 0.72      | 5.13         | 1.53      |
| IL-12p70                          | 0.08        | 0.85      | 2.38        | 1.50      | 2.67          | 0.72      | 5.02         | 1.51      |
| IL-6                              | -0.01       | 0.92      | 1.91        | 1.28      | 2.92          | 0.58      | 3.96         | 0.96      |

Table S2. Regression Model Statistics for Cytokines Predicting Depressive Symptoms and Trait Anxiety in 262 Healthy Adolescent Girls.

|                   | Depressive Symptoms |            |         |                           | Trait Anxiety |            |         |                           |
|-------------------|---------------------|------------|---------|---------------------------|---------------|------------|---------|---------------------------|
|                   | <i>B</i>            | <i>SEB</i> | $\beta$ | 95% <i>CI</i> of <i>B</i> | <i>B</i>      | <i>SEB</i> | $\beta$ | 95% <i>CI</i> of <i>B</i> |
| <i>Block 1</i>    |                     |            |         |                           |               |            |         |                           |
| Age               | 0.73                | 0.76       | 0.11    | -0.76, 2.22               | 1.38          | 0.68       | 0.24*   | 0.04, 2.72                |
| Race (Non-White)  | 1.46                | 1.74       | 0.06    | -1.96, 4.89               | 2.15          | 1.57       | 0.11    | -0.95, 5.24               |
| Family SES        | -0.05               | 0.06       | -0.06   | -0.18, 0.07               | 0.00          | 0.06       | 0.00    | -0.11, 0.11               |
| Gynecological age | -0.27               | 0.65       | -0.05   | -1.56, 1.01               | -0.95         | 0.59       | -0.18   | -2.11, 0.21               |
| BMI               | 0.38                | 0.86       | 0.03    | -1.32, 2.09               | 0.75          | 0.78       | 0.07    | -0.78, 2.28               |
| Smoking Status    | 1.18                | 0.63       | 0.15†   | -0.08, 2.43               | 0.64          | 0.57       | 0.09    | -0.49, 1.78               |
| <i>Block 2</i>    |                     |            |         |                           |               |            |         |                           |
| Age               | 0.75                | 0.72       | 0.12    | -0.66, 2.16               | 1.41          | 0.65       | 0.24*   | 0.13, 2.69                |
| Race (Non-White)  | 2.93                | 1.67       | 0.13†   | -0.35, 6.22               | 3.34          | 1.52       | 0.16*   | 0.35, 6.33                |
| Family SES        | -0.03               | 0.06       | -0.04   | -0.15, 0.09               | 0.02          | 0.05       | 0.02    | -0.09, 0.12               |
| Gynecological age | -0.30               | 0.63       | -0.05   | -1.53, 0.93               | -0.97         | 0.57       | -0.18†  | -2.09, 0.15               |
| BMI               | 0.46                | 0.82       | 0.04    | -1.15, 2.07               | 0.84          | 0.74       | 0.08    | -0.62, 2.31               |
| Smoking Status    | 1.37                | 0.60       | 0.18*   | 0.19, 2.55                | 0.84          | 0.55       | 0.12    | -0.25, 1.92               |
| Factor 1          | 3.39                | 0.71       | 0.49*** | 2.00, 4.78                | 2.84          | 0.64       | 0.45*** | 1.57, 4.11                |
| Factor 2          | -0.52               | 0.68       | -0.07   | -1.86, 0.81               | -0.61         | 0.62       | -0.09   | -1.83, 0.60               |
| Factor 3          | -2.94               | 1.38       | -0.18*  | -5.68, -0.21              | -2.39         | 1.30       | -0.16†  | -4.95, 0.16               |
| Factor 4          | -0.62               | 0.79       | -0.09   | -2.19, 0.94               | -0.49         | 0.72       | -0.08   | -1.91, 0.93               |

Note. SES = Socio-economic status; BMI = Body Mass Index (z-scored);

† $p < .10$ , \* $p < .05$ , \*\* $p < .01$ , \*\*\* $p < .001$ .

Table S3. Multinomial Logistic Regression: Psychological Health Constructs Predict Latent Profile Membership

|                | High Innate vs. Low Overall |            |                        |               | High Adaptive vs. Low Overall |            |                        |               | High Overall vs. Low Overall |            |                        |               |
|----------------|-----------------------------|------------|------------------------|---------------|-------------------------------|------------|------------------------|---------------|------------------------------|------------|------------------------|---------------|
|                | <i>B</i>                    | <i>SEB</i> | <i>e<sup>(B)</sup></i> | 95% <i>CI</i> | <i>B</i>                      | <i>SEB</i> | <i>e<sup>(B)</sup></i> | 95% <i>CI</i> | <i>B</i>                     | <i>SEB</i> | <i>e<sup>(B)</sup></i> | 95% <i>CI</i> |
| Depressive Sx  |                             |            |                        |               |                               |            |                        |               |                              |            |                        |               |
| Age            | 0.18                        | 0.19       | 1.20                   | 0.83, 1.73    | 0.08                          | 0.19       | 1.08                   | 0.75, 1.57    | 0.07                         | 0.26       | 1.07                   | 0.64, 1.80    |
| Race (NW)      | 0.10                        | 0.43       | 1.10                   | 0.47, 2.57    | 0.76                          | 0.43       | 2.13†                  | 0.92, 4.96    | 1.80                         | 0.69       | 6.05*                  | 1.57, 23.41   |
| Family SES     | 0.03                        | 0.02       | 1.03†                  | 1.00, 1.06    | 0.02                          | 0.02       | 1.02                   | 0.98, 1.05    | 0.03                         | 0.02       | 1.03                   | 0.98, 1.08    |
| Gyn. Age       | -0.34                       | 0.16       | 0.71*                  | 0.52, 0.98    | -0.24                         | 0.17       | 0.79                   | 0.57, 1.09    | -0.34                        | 0.24       | 0.71                   | 0.44, 1.15    |
| BMI            | -0.01                       | 0.21       | 0.99                   | 0.66, 1.49    | 0.08                          | 0.22       | 1.08                   | 0.71, 1.66    | 0.42                         | 0.34       | 1.53                   | 0.78, 3.01    |
| Smoking Status | -0.03                       | 0.15       | 0.97                   | 0.72, 1.31    | -0.39                         | 0.17       | 0.67*                  | 0.48, 0.94    | -0.04                        | 0.27       | 0.96                   | 0.57, 1.62    |
| Depressive Sx  | 0.02                        | 0.02       | 1.02                   | 0.98, 1.06    | 0.09                          | 0.02       | 1.10***                | 1.05, 1.14    | 0.05                         | 0.03       | 1.05                   | 0.99, 1.11    |
| Trait Anxiety  |                             |            |                        |               |                               |            |                        |               |                              |            |                        |               |
| Age            | 0.18                        | 0.19       | 1.20                   | 0.83, 1.73    | 0.00                          | 0.19       | 1.00                   | 0.69, 1.45    | 0.04                         | 0.27       | 1.04                   | 0.62, 1.74    |
| Race (NW)      | 0.08                        | 0.43       | 1.08                   | 0.46, 2.54    | 0.82                          | 0.43       | 2.27†                  | 0.98, 5.28    | 1.88                         | 0.70       | 6.54**                 | 1.65, 25.83   |
| Family SES     | 0.03                        | 0.02       | 1.03†                  | 1.00, 1.06    | 0.01                          | 0.02       | 1.01                   | 0.98, 1.04    | 0.03                         | 0.02       | 1.03                   | 0.98, 1.08    |
| Gyn. Age       | -0.33                       | 0.16       | .72*                   | 0.52, 0.99    | -0.15                         | 0.17       | .86                    | 0.62, 1.19    | -0.30                        | 0.24       | .74                    | 0.46, 1.20    |
| BMI            | 0.00                        | 0.21       | 1.00                   | 0.67, 1.51    | 0.07                          | 0.21       | 1.07                   | 0.70, 1.62    | 0.42                         | 0.34       | 1.52                   | 0.78, 2.99    |
| Smoking Status | 0.01                        | 0.15       | 1.02                   | 0.76, 1.36    | -0.32                         | 0.17       | .72†                   | 0.52, 1.01    | 0.01                         | 0.27       | 1.01                   | 0.60, 1.70    |
| Trait Anxiety  | 0.00                        | 0.02       | 1.00                   | 0.96, 1.04    | 0.09                          | 0.02       | 1.09***                | 1.05, 1.14    | 0.04                         | 0.03       | 1.05                   | 0.98, 1.11    |

Note. Sx = Symptoms; SES = Socioeconomic Status; NW = Non-White; Gyn. = Gynecological.

†*p* < .10, \**p* < .05, \*\**p* < .01, \*\*\**p* < .001.
